# Supplementary material
Source: PubMed Central journal article supplement (PMC2992232)
Supplement: supp_M110.134445_jbc.M110.134445-1.pdf [file supp_M110.134445_jbc.M110.134445-1.pdf]

# Insight into the role of dynamics in the conformational switch of the small GTP-binding protein Arf1

Vanessa Buosi, Jean-Pierre Placial, Jean-Louis Leroy, Jacqueline Cherfils, Éric Guittet and Carine van Heijenoort\*

## Supplementary material

**Figure S1.** (A) HSQC  $^1\text{H}$ - $^{15}\text{N}$  spectra of  $\Delta 17\text{Arf1-GTP}$  (after 2 hours),  $T=298\text{K}$ . Peaks corresponding to  $\Delta 17\text{Arf1-GDP}$  are indicating by arrows. (B) HSQC  $^1\text{H}$ - $^{15}\text{N}$  spectra of  $\Delta 17\text{Arf1-GTP}\gamma\text{S}$  (blue),  $T=298\text{K}$ . G24, T48, I49 and a side chain of tryptophan of the GTP form which have  $\text{CSV} > 0.2$  are indicated by crosses.

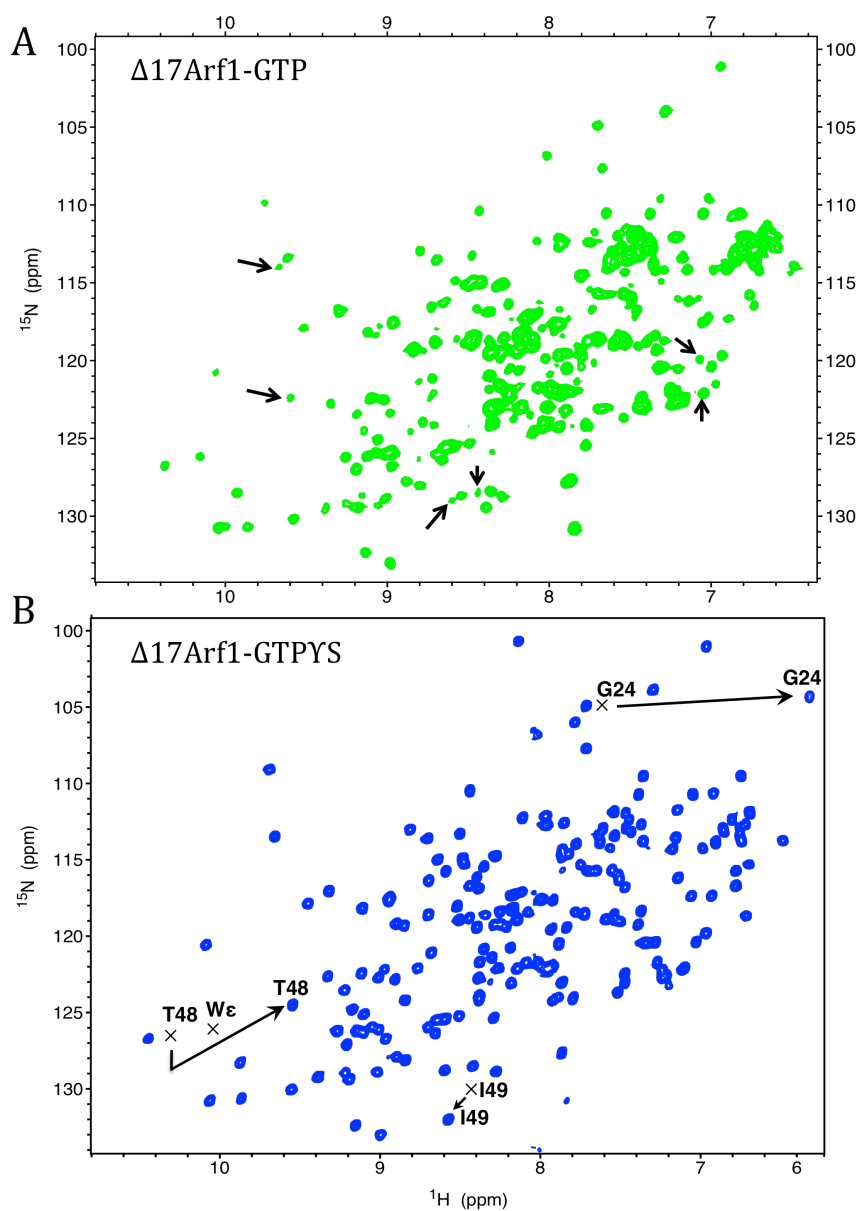

**Figure S2.** Normalized  $^1\text{H}^{\text{N}}$  and  $^{15}\text{N}$  Chemical Shifts Variation between (A) Arf1-GDP and  $\Delta 17\text{Arf1-GDP}$  and between (B)  $\Delta 17\text{Arf1-GDP}$  and  $\Delta 17\text{Arf1-GTP}$ . The secondary structures are represented as black and grey bars for strands and helices, respectively. Switch regions are indicated too.

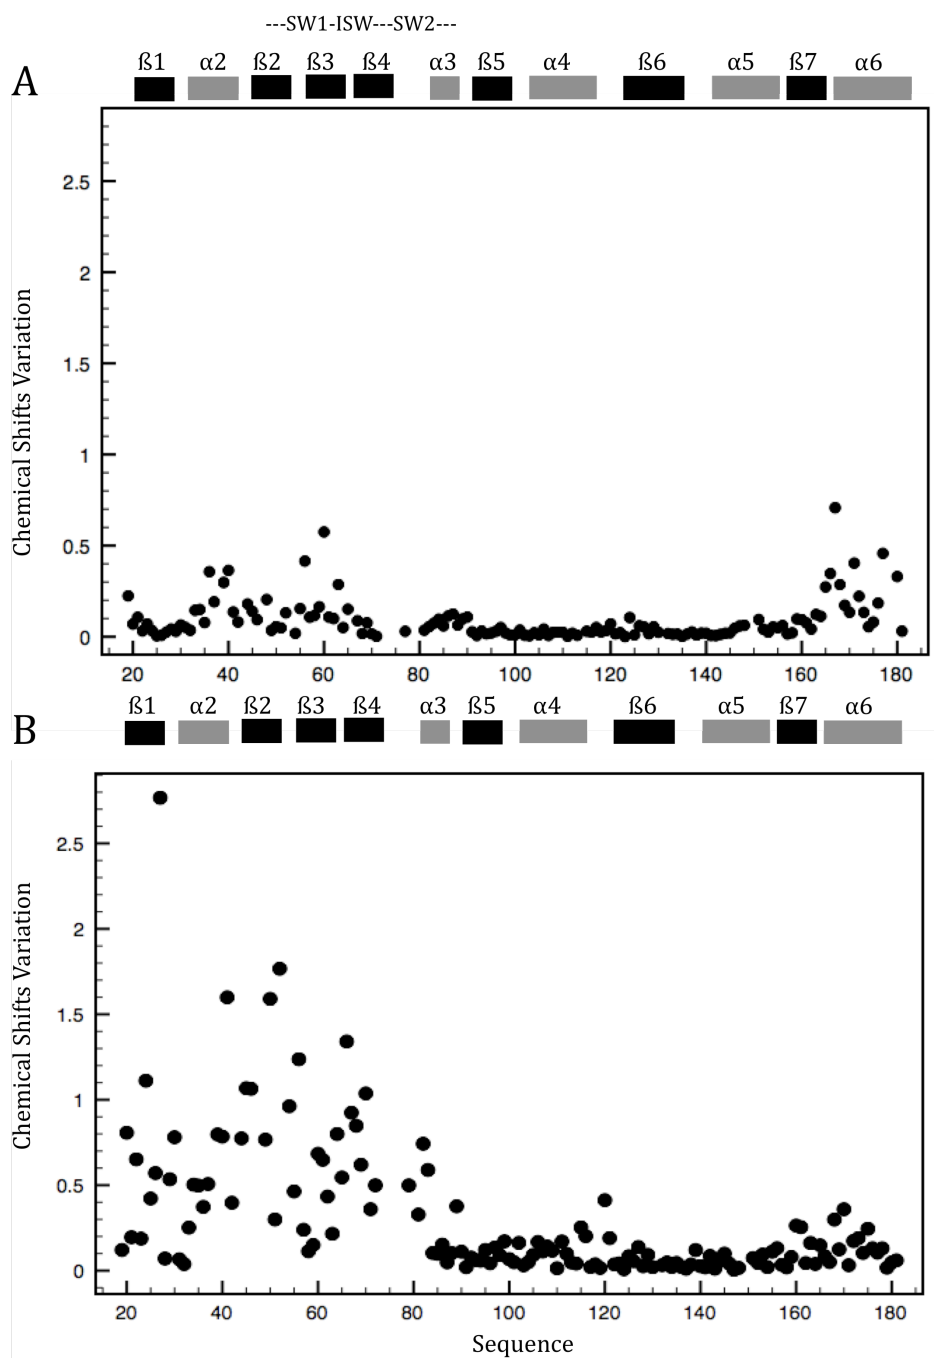

**Figure S3. Back calculation of  $H^N$  in  $\Delta 17\text{Arf1-GDP}$ .**  $H^N$  Chemical Shift Variation calculated from experimental data (in blue) or predicted by SPARTA (x10, in red) between Arf1-GDP and  $\Delta 17\text{Arf1-GDP}$ .

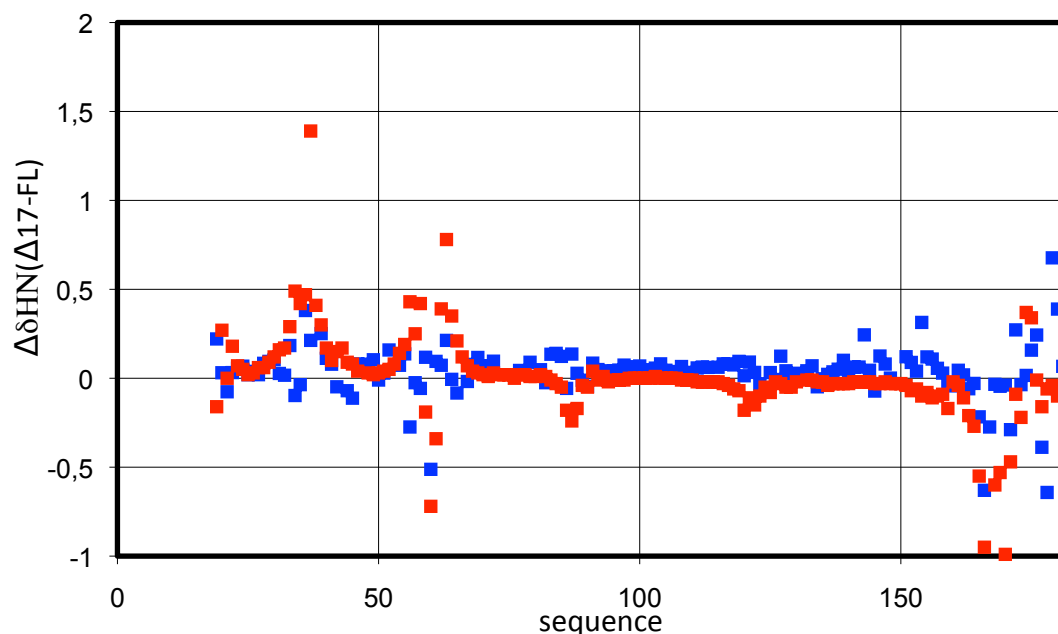

**Figure S4. Half time conversion.** The conformational exchange rates of GDP forms were obtained from the fit of the decreasing intensities of 29 peaks of GDP form.

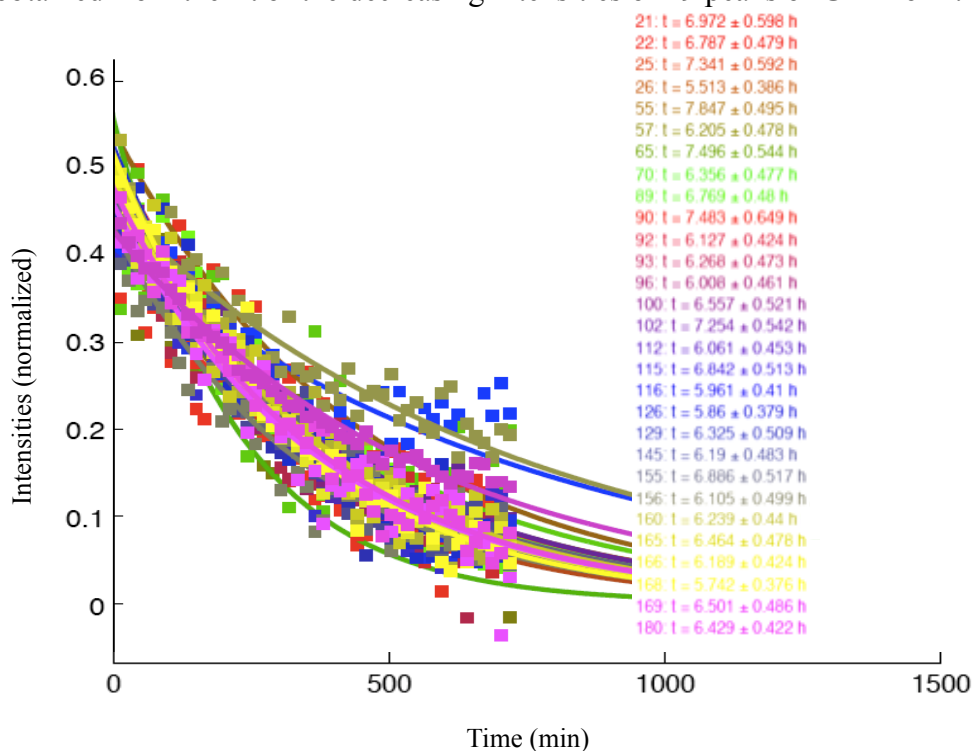

**Figure S5.**  $^{15}\text{N}$  relaxation parameters (R1, R2 and  $nOe$   $^1\text{H}$ - $^{15}\text{N}$ ) measured on Arf1-GDP (black),  $\Delta 17\text{Arf1-GDP}$  (red) and  $\Delta 17\text{Arf1-GTP}$  (green) at 298K. The secondary structures are represented as black and grey bars for strands and helices, respectively. Switch regions are indicated too.

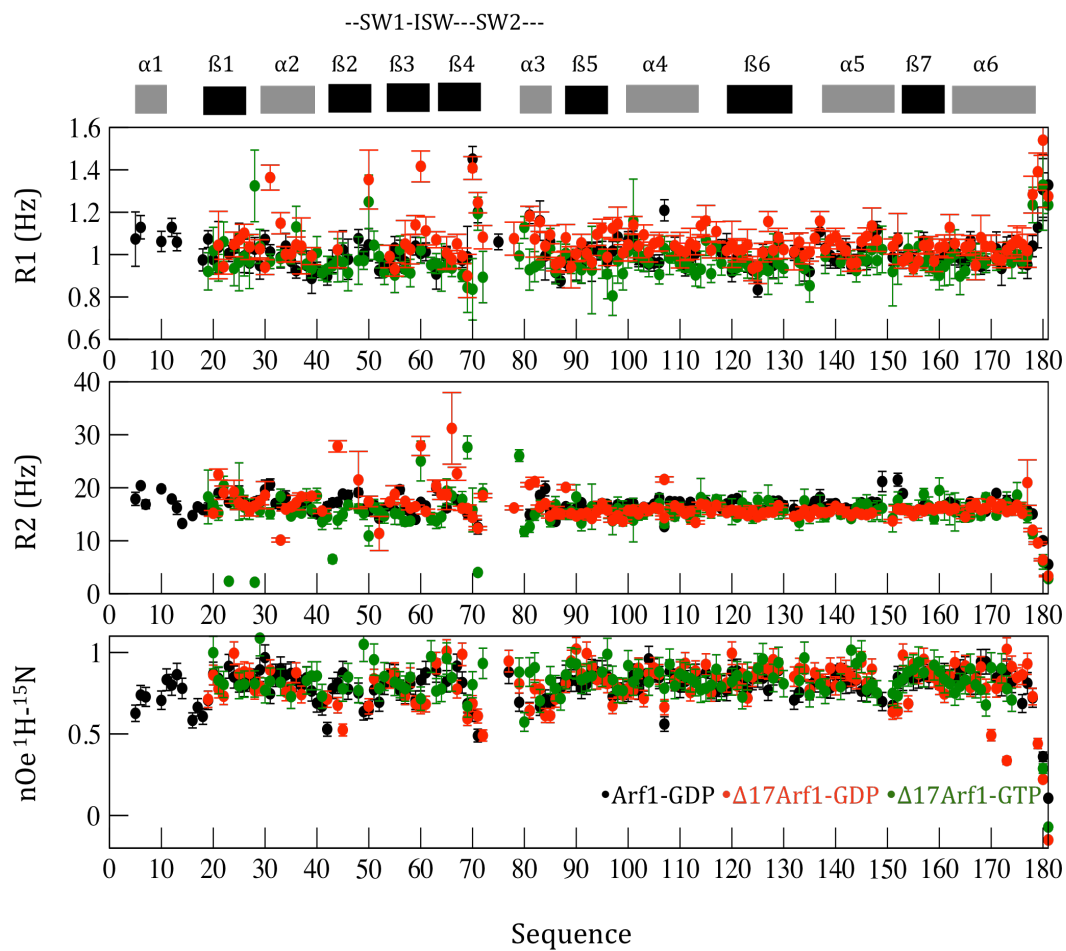

**Figure S6.**  $^{31}\text{P}$  1D spectra of 10mM  $\text{GTP}\gamma\text{S}$  (500MHz,  $T=298\text{K}$ ) used for the nucleotide exchange experiment.  $^{31}\text{P}$  chemical shifts are referenced with respect to phosphoric acid 50%.

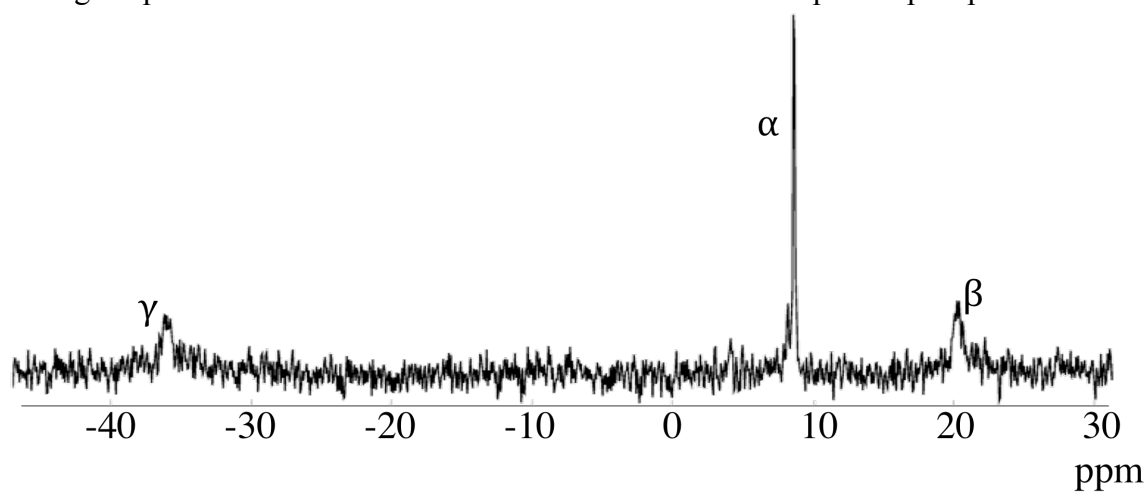

**Table S1:**  $^1\text{HN}$ ,  $^{15}\text{N}$ , CA, CB, C chemicals shifts of  $\Delta 17\text{Arf1-GDP}$  (pH=7.3, T=298K).

|      | $\Delta 17\text{Arf1-GDP}$ |       |       |       |       |
|------|----------------------------|-------|-------|-------|-------|
|      | C                          | CA    | CB    | HN    | N     |
| R19  | 174.8                      | 56.41 | 31.02 | 8.949 | 125.2 |
| I20  | 174.8                      | 58.40 | 39.05 | 8.650 | 125.6 |
| L21  | 174.7                      | -     | 52.32 | 8.103 | 128.3 |
| M22  | 172.8                      | 53.96 | -     | 9.065 | 126.3 |
| V23  | 174.2                      | 57.56 | 36.59 | 8.450 | 115.1 |
| G24  | 173.1                      | 43.50 | -     | 6.461 | 102.6 |
| L25  | 178.3                      | 55.74 | 40.81 | 10.14 | 124.8 |
| D26  | 175.3                      | 55.80 | 40.32 | 8.727 | 119.7 |
| A27  | 175.5                      | 53.38 | 16.56 | 10.69 | 122.8 |
| A28  | 176.2                      | 55.55 | 19.62 | 7.454 | 123.2 |
| G29  | 174.0                      | 45.66 | -     | 8.588 | 102.8 |
| K30  | 177.3                      | 59.84 | 31.59 | 9.669 | 122.7 |
| T31  | 175.8                      | -     | -     | 9.070 | 121.8 |
| T32  | 176.7                      | 67.13 | 71.99 | 8.824 | 119.4 |
| I33  | 176.3                      | -     | 36.74 | 7.922 | 122.2 |
| L34  | 179.6                      | 58.12 | 41.50 | 7.829 | 117.8 |
| Y35  | 179.3                      | 61.57 | 38.03 | 8.097 | 116.3 |
| K36  | 178.2                      | 56.41 | 31.10 | 8.227 | 121.7 |
| L37  | -                          | 56.23 | 41.42 | 7.626 | 116.5 |
| K38  | 175.9                      | 56.92 | 29.87 | 7.416 | 114.3 |
| L39  | -                          | 55.17 | 41.72 | 8.132 | 119.1 |
| G40  | 172.6                      | 44.45 | -     | 7.061 | 103.2 |
| E41  | -                          | 56.33 | -     | 8.291 | 120.7 |
| I42  | -                          | -     | -     | 8.227 | 124.5 |
| V43  | 176.0                      | 62.10 | 32.78 | -     | -     |
| T44  | -                          | 61.84 | 69.67 | 8.716 | 124.6 |
| T45  | 172.4                      | 60.77 | 71.13 | 9.169 | 121.7 |
| I46  | -                          | 58.07 | 38.03 | 8.382 | 123.2 |
| P47  | -                          | -     | -     | -     | -     |
| T48  | 171.8                      | 60.42 | 69.78 | 7.339 | 109.8 |
| I49  | 177.0                      | 63.38 | 36.86 | 7.840 | 124.0 |
| G50  | 173.4                      | 44.87 | -     | 8.732 | 114.2 |
| F51  | 171.0                      | 54.77 | 39.84 | 8.234 | 123.2 |
| N52  | -                          | 52.55 | 39.98 | 7.778 | 121.9 |
| V53  | 175.7                      | 61.43 | 33.75 | -     | -     |
| E54  | 175.7                      | 54.48 | 32.36 | 8.763 | 126.4 |
| T55  | 173.5                      | 59.66 | 72.20 | 8.910 | 113.9 |
| V56  | 172.8                      | 61.21 | 35.02 | 8.214 | 119.3 |
| E57  | 174.8                      | 55.09 | 31.32 | 8.390 | 125.9 |
| Y58  | 173.3                      | 56.72 | 41.06 | 9.005 | 125.6 |
| K59  | 175.8                      | 58.18 | 29.33 | 8.729 | 124.1 |
| N60  | 173.7                      | 53.85 | 37.62 | 8.351 | 117.1 |
| I61  | 174.5                      | 61.13 | 39.27 | 8.631 | 122.4 |
| S62  | 173.6                      | 56.90 | 64.47 | 8.318 | 121.0 |
| F63  | 176.1                      | 57.45 | 42.07 | 9.279 | 125.8 |
| T64  | 173.2                      | 63.46 | 70.38 | 8.255 | 119.8 |
| V65  | 176.1                      | 60.44 | 34.63 | 9.360 | 127.0 |
| W66  | 172.6                      | 57.48 | 30.72 | 7.629 | 122.8 |
| D67  | 176.7                      | 53.37 | 41.41 | 8.769 | 117.0 |
| V68  | 175.3                      | 59.52 | 31.78 | 7.805 | 114.2 |
| G69  | 174.4                      | 45.13 | -     | 8.213 | 107.4 |
| G70  | 174.8                      | 45.70 | -     | 8.706 | 110.3 |
| Q71  | 176.7                      | 56.20 | 28.98 | 8.496 | 119.4 |
| D72  | -                          | 56.22 | 40.56 | 8.480 | 121.0 |
| K73  | -                          | -     | -     | -     | -     |
| I74  | -                          | -     | -     | -     | -     |
| R75  | -                          | -     | -     | -     | -     |
| P76  | -                          | -     | -     | -     | -     |
| L77  | 178.1                      | 56.67 | 41.10 | 7.529 | 116.2 |
| W78  | -                          | 55.34 | 35.77 | 7.352 | 117.1 |
| R79  | -                          | -     | -     | 7.014 | 115.7 |
| H80  | 176.5                      | 58.28 | 29.20 | -     | -     |
| Y81  | 176.8                      | 59.18 | 38.41 | 7.379 | 115.9 |
| F82  | 177.4                      | 56.25 | 38.13 | 7.652 | 115.8 |
| Q83  | 176.0                      | 57.59 | 28.32 | 7.554 | 118.3 |
| N84  | 174.6                      | 54.09 | 37.47 | 8.862 | 118.1 |
| T85  | 174.7                      | 64.92 | 69.26 | 7.978 | 116.7 |
| Q86  | 175.7                      | 57.33 | 31.09 | 8.473 | 124.1 |
| G87  | 168.4                      | 44.63 | -     | 7.635 | 104.7 |
| L88  | 173.4                      | 53.16 | 45.86 | 9.224 | 126.1 |
| I89  | 174.3                      | 58.91 | -     | 9.536 | 125.1 |
| F90  | 174.4                      | 55.91 | 43.52 | 9.120 | 129.3 |
| V91  | 173.6                      | 61.60 | -     | 8.369 | 128.5 |
| V92  | 173.5                      | 59.33 | 35.70 | 8.748 | 123.2 |
| D93  | 177.5                      | 53.42 | 40.65 | 9.092 | 124.0 |
| S94  | 172.8                      | 61.25 | 63.43 | 8.420 | 123.6 |
| N95  | 174.0                      | 53.07 | 41.86 | 9.090 | 117.8 |
| D96  | 176.6                      | 51.73 | 39.15 | 6.901 | 119.4 |
| R97  | 178.5                      | 58.95 | 29.28 | 8.056 | 124.2 |
| E98  | 178.6                      | 58.87 | 29.47 | 8.398 | 118.6 |
| R99  | 177.1                      | 56.44 | 30.75 | 7.334 | 114.3 |
| V100 | 175.7                      | 65.67 | 31.02 | 7.008 | 121.5 |
| N101 | 177.3                      | 56.45 | 37.55 | 8.305 | 119.6 |
| E102 | 178.5                      | 59.21 | 28.84 | 7.676 | 123.0 |
| A103 | 178.3                      | 55.87 | 17.38 | 8.024 | 121.9 |
| R104 | 177.5                      | 60.17 | 28.97 | 8.099 | 116.9 |
| E105 | 180.1                      | 59.55 | 28.82 | 8.048 | 117.8 |
| E106 | 177.4                      | 58.51 | 24.75 | 8.262 | 117.3 |
| L107 | 178.2                      | 58.59 | 39.49 | 8.360 | 123.0 |
| M108 | 179.8                      | 57.32 | 30.44 | 8.452 | 115.3 |
| R109 | 179.8                      | 59.63 | 30.13 | 7.929 | 119.4 |
| M110 | 177.7                      | 58.62 | 31.70 | 7.630 | 118.7 |
| L111 | 177.0                      | 55.93 | 40.12 | 7.975 | 114.1 |
| A112 | 178.3                      | 52.18 | 18.74 | 7.102 | 119.9 |
| E113 | 178.8                      | 56.26 | 28.03 | 7.326 | 118.7 |
| D114 | 179.2                      | 58.20 | 40.94 | 9.214 | 129.3 |
| E115 | 177.2                      | 58.84 | 29.76 | 9.564 | 116.5 |
| L116 | 178.1                      | 53.35 | 41.14 | 7.346 | 114.9 |
| R117 | 175.9                      | 59.99 | 29.86 | 7.441 | 123.0 |
| D118 | 176.2                      | 53.99 | 41.51 | 8.437 | 115.1 |
| A119 | 178.1                      | 52.77 | 17.60 | 7.195 | 122.4 |
| V120 | 173.5                      | 62.72 | 32.09 | 7.501 | 122.8 |
| L121 | 172.7                      | 53.60 | 45.84 | 8.505 | 127.0 |
| L122 | 174.1                      | 55.34 | 34.06 | 9.200 | 128.9 |
| V123 | 175.9                      | 56.36 | 31.65 | 8.992 | 125.7 |
| F124 | 174.5                      | 52.77 | 39.36 | 8.654 | 125.5 |
| A125 | 174.6                      | 50.09 | 16.55 | 8.641 | 129.1 |
| N126 | 176.7                      | 52.83 | 41.11 | 8.674 | 121.7 |
| K127 | 176.3                      | 57.07 | -     | 7.602 | 116.9 |
| Q128 | 174.8                      | 56.96 | 28.47 | 7.973 | 112.8 |
| D129 | 174.6                      | 54.33 | 40.54 | 9.713 | 114.0 |
| L130 | -                          | 54.84 | 38.98 | 7.222 | 122.5 |
| P131 | 177.5                      | 64.61 | 31.57 | -     | -     |
| N132 | 175.2                      | 52.30 | 38.41 | 8.522 | 115.1 |
| A133 | 178.5                      | 53.36 | 18.22 | 7.293 | 121.9 |
| M134 | 175.1                      | 56.47 | 35.43 | 8.191 | 122.7 |
| N135 | 175.3                      | 51.41 | 38.65 | 8.700 | 118.9 |
| A136 | 180.0                      | 55.84 | 17.69 | 8.844 | 119.3 |

|      |       |       |       |       |        |
|------|-------|-------|-------|-------|--------|
| A137 | 180.2 | 55.74 | 17.58 | 8.356 | 123.9  |
| E138 | 179.3 | 59.23 | 29.29 | 8.302 | 121.7  |
| I139 | 177.1 | 63.62 | 35.69 | 8.410 | 119.3  |
| T140 | 176.2 | 67.94 | -     | 8.158 | 117.1  |
| D141 | 179.1 | 57.53 | 41.49 | 7.333 | 120.4  |
| K142 | 178.7 | 58.70 | 32.77 | 8.538 | 118.9  |
| L143 | 175.4 | 54.93 | 41.41 | 8.316 | 115.0  |
| G144 | 177.3 | 46.35 | -     | 7.316 | 104.1  |
| L145 | -     | 56.80 | 37.42 | 7.229 | 116.1  |
| H146 | 176.6 | 58.81 | 29.42 | 7.963 | 112.3  |
| S147 | 176.7 | 59.18 | 63.84 | 7.533 | 113.3  |
| L148 | 174.4 | 54.82 | 40.14 | 7.215 | 122.5  |
| R149 | 176.7 | 58.6  | -     | 8.34  | 123.01 |
| H150 | 176.9 | 56.11 | 28.26 | 122.2 | 7.94   |
| R151 | 174.0 | 53.46 | 31.66 | 7.769 | 118.7  |
| N152 | 173.6 | 52.75 | 38.23 | 9.225 | 127.3  |
| W153 | 173.9 | 53.98 | 34.64 | 7.862 | 121.4  |
| Y154 | 172.7 | 56.99 | 39.90 | 8.096 | 121.7  |
| I155 | 170.4 | 57.76 | 40.67 | 7.078 | 123.3  |
| Q156 | 174.8 | 52.33 | 32.50 | 8.841 | 126.4  |
| A157 | 178.0 | 52.31 | 18.75 | 8.987 | 133.2  |
| T158 | 173.8 | 60.85 | 72.96 | 8.662 | 116.1  |
| C159 | 174.6 | 57.85 | 28.75 | 8.270 | 120.5  |

|      |       |       |       |       |       |
|------|-------|-------|-------|-------|-------|
| A160 | 177.0 | 55.28 | 19.92 | 9.404 | 132.5 |
| T161 | 176.7 | 63.61 | 66.97 | 7.055 | 103.3 |
| S162 | 176.1 | 58.17 | 64.55 | 7.522 | 115.2 |
| G163 | 173.4 | 45.10 | -     | 8.246 | 112.5 |
| D164 | 176.7 | 56.33 | 41.12 | 7.825 | 124.0 |
| G165 | 174.5 | 47.03 | -     | 8.603 | 113.4 |
| L166 | 178.7 | 57.92 | 41.37 | 7.098 | 117.7 |
| Y167 | 178.4 | 61.84 | 36.39 | 8.430 | 117.1 |
| E168 | 180.7 | 61.03 | 27.93 | 9.595 | 122.3 |
| G169 | 174.5 | 47.72 | -     | 8.139 | 106.8 |
| L170 | 179.2 | 58.07 | 40.66 | 8.268 | 121.9 |
| D171 | 178.4 | 57.57 | 40.96 | 8.839 | 121.6 |
| W172 | 178.8 | 62.94 | 27.46 | 7.511 | 120.8 |
| L173 | 178.0 | 58.27 | 42.39 | 8.035 | 119.9 |
| S174 | 173.8 | 61.75 | 62.81 | 8.729 | 113.6 |
| N175 | 177.5 | 56.11 | 38.06 | 7.765 | 118.6 |
| Q176 | 178.1 | 56.71 | 27.85 | 7.501 | 117.3 |
| L177 | 177.8 | 55.30 | 41.12 | 7.374 | 117.1 |
| R178 | 176.4 | 57.53 | 29.82 | 7.395 | 118.8 |
| N179 | 174.8 | 53.42 | 38.71 | 7.928 | 117.3 |
| Q180 | 174.9 | 55.83 | 29.09 | 7.815 | 120.4 |
| K181 | -     | 57.73 | 32.86 | 7.913 | 127.8 |

**Table S2:**  $^1\text{HN}$ ,  $^{15}\text{N}$ , CA, CB, C chemicals shifts of  $\Delta 17\text{Arf1-GTP}\gamma\text{S}$  and  $^1\text{HN}$ ,  $^{15}\text{N}$  chemicals shifts of  $\Delta 17\text{Arf1-GTP}$  (pH=7.3, T=298K).

|     | GTP $\gamma$ S |       |       |       |       | GTP     |       |
|-----|----------------|-------|-------|-------|-------|---------|-------|
|     | C              | CA    | CB    | HN    | N     | HN      | N     |
| M18 | 174.5          | 55.40 | 33.80 | -     | -     | -       | -     |
| R19 | 174.8          | 57.22 | 30.46 | 9.137 | 126.4 | -       | -     |
| I20 | 173.8          | 56.61 | 38.52 | 9.415 | 129.3 | 129.488 | 9.398 |
| L21 | 172.9          | 53.49 | 45.35 | 8.302 | 128.9 | 128.849 | 8.308 |
| M22 | 172.6          | 54.58 | 35.84 | 9.573 | 130.0 | 130.195 | 9.605 |
| V23 | 173.8          | 57.28 | 34.91 | 8.304 | 114.7 | 115.064 | 8.315 |
| G24 | 173.2          | 43.51 | -     | 5.990 | 105.7 | 104.712 | 7.586 |
| L25 | 175.9          | 55.73 | 39.99 | 10.10 | 120.7 | 120.793 | 10.08 |
| D26 | 176.2          | 54.02 | 40.92 | 8.397 | 116.2 | 116.345 | 8.314 |
| A27 | 175.5          | 53.71 | 16.90 | 8.001 | 117.6 | 117.770 | 8.005 |
| A28 | 176.0          | 56.17 | 19.70 | 7.495 | 122.6 | 122.547 | 7.493 |
| G29 | 173.0          | 45.45 | -     | 8.153 | 100.7 | 100.597 | 8.139 |
| K30 | 179.6          | 58.52 | 38.39 | 8.990 | 122.3 | 122.179 | 9.105 |
| T31 | 176.7          | 59.87 | 63.38 | 9.130 | 122.4 | 122.486 | 9.124 |
| T32 | 176.9          | 65.61 | 67.97 | 8.916 | 119.2 | 119.373 | 8.877 |
| I33 | 176.7          | 66.61 | 37.33 | 8.159 | 122.2 | 121.640 | 8.201 |
| L34 | 178.1          | 58.24 | 41.42 | 8.310 | 119.3 | 119.484 | 8.315 |
| Y35 | 177.9          | 63.30 | 37.93 | 7.872 | 112.6 | 112.518 | 7.816 |
| K36 | 180.4          | 58.12 | 30.88 | 8.308 | 125.4 | 125.540 | 8.306 |
| L37 | 178.6          | 57.16 | 41.92 | 8.085 | 118.4 | 118.517 | 8.133 |
| K38 | 176.9          | 58.16 | 33.57 | 8.404 | 116.9 | 116.862 | 8.398 |
| L39 | 178.6          | 54.60 | 43.66 | 8.721 | 113.6 | 113.515 | 8.726 |
| G40 | 173.8          | 46.05 | -     | 7.728 | 107.8 | 107.694 | 7.720 |
| E41 | 174.3          | 53.98 | 33.68 | 6.805 | 116.7 | 116.616 | 6.781 |
| I42 | 176.2          | 59.40 | 36.48 | 8.370 | 120.9 | 120.932 | 8.384 |
| V43 | 175.4          | 59.47 | 33.17 | 7.883 | 123.1 | 123.158 | 7.917 |
| T44 | 174.7          | 62.68 | 68.63 | 8.269 | 118.4 | 118.490 | 8.286 |
| T45 | 173.9          | 59.72 | 70.87 | 8.200 | 118.3 | 118.205 | 8.201 |
| I46 | -              | 58.71 | 38.50 | 7.884 | 114.5 | 114.432 | 7.830 |
| P47 | 177.6          | 64.61 | 31.76 | -     | -     | -       | -     |
| T48 | 173.9          | 63.02 | 69.03 | 9.561 | 124.5 | 126.630 | 10.38 |

|     |       |       |       |       |       |         |       |
|-----|-------|-------|-------|-------|-------|---------|-------|
| I49 | 175.5 | 59.39 | 34.61 | 8.584 | 131.9 | 129.592 | 8.410 |
| G50 | 174.6 | 45.21 | -     | 7.165 | 111.7 | 111.892 | 7.212 |
| F51 | 173.5 | 55.49 | 42.08 | 7.958 | 122.0 | 121.966 | 7.952 |
| N52 | 173.2 | 52.17 | 42.28 | 9.470 | 117.9 | 117.905 | 9.541 |
| V53 | 171.3 | 59.53 | 33.35 | 8.704 | 121.2 | 121.135 | 8.715 |
| E54 | 174.8 | 53.38 | 33.30 | 7.977 | 122.1 | 122.717 | 7.987 |
| T55 | 174.1 | 61.72 | 69.64 | 9.131 | 118.2 | 118.205 | 9.133 |
| V56 | 173.9 | 60.36 | 34.65 | 9.281 | 126.2 | 126.202 | 9.286 |
| E57 | 176.0 | 55.04 | 30.47 | 8.677 | 126.3 | 126.311 | 8.669 |
| Y58 | 173.6 | 57.98 | 40.96 | 8.998 | 126.7 | 126.747 | 8.985 |
| K59 | 175.5 | 57.78 | 29.59 | 8.672 | 125.6 | 125.566 | 8.676 |
| N60 | 173.9 | 54.60 | 37.56 | 8.460 | 110.5 | 110.539 | 8.453 |
| I61 | 174.0 | 59.87 | 39.26 | 8.031 | 121.8 | 121.876 | 8.030 |
| S62 | 173.3 | 56.95 | 63.33 | 7.951 | 119.5 | 119.534 | 7.946 |
| F63 | 175.2 | 56.43 | 40.19 | 9.130 | 125.1 | 125.114 | 9.101 |
| T64 | 172.5 | 63.27 | 68.97 | 9.030 | 122.6 | 122.701 | 9.044 |
| V65 | 173.7 | 61.23 | 32.09 | 8.868 | 128.1 | 128.224 | 8.854 |
| W66 | 173.4 | 57.29 | 29.28 | 8.934 | 127.9 | 127.875 | 8.912 |
| D67 | 175.3 | 52.57 | 44.19 | 9.087 | 125.9 | 126.125 | 9.080 |
| V68 | 175.5 | 59.87 | 32.84 | 7.302 | 120.5 | 120.710 | 7.262 |
| G69 | 174.5 | 47.23 | -     | 7.795 | 106.0 | 105.808 | 7.674 |
| G70 | 176.0 | 45.11 | -     | 9.727 | 109.2 | 109.056 | 9.714 |
| Q71 | 177.0 | 57.98 | 28.92 | 8.393 | 122.8 | 122.903 | 8.386 |
| D72 | 178.5 | 58.75 | 40.17 | 8.941 | 122.9 | 123.149 | 8.961 |
| K73 | 176.8 | 58.10 | 31.93 | 8.612 | 115.9 | 116.201 | 8.677 |
| I74 | 176.5 | 59.89 | 36.79 | 7.883 | 114.7 | 114.737 | 7.833 |
| R75 | -     | -     | 27.04 | 7.141 | 122.3 | 122.296 | 7.115 |
| P76 | 177.6 | 65.62 | 30.92 | -     | -     | -       | -     |
| L77 | 177.3 | 55.30 | 40.32 | 7.791 | 114.0 | 114.563 | 7.827 |
| W78 | 176.9 | 59.18 | 29.55 | 8.293 | 122.1 | 122.344 | 8.282 |
| R79 | 177.7 | 56.26 | 28.88 | 6.943 | 110.7 | 110.866 | 6.932 |
| H80 | 175.6 | 56.90 | 29.01 | 7.514 | 119.1 | 118.985 | 7.499 |
| Y81 | 175.7 | 57.21 | 39.17 | 7.685 | 115.8 | 115.652 | 7.655 |
| F82 | 177.3 | 56.44 | 37.47 | 6.953 | 117.5 | 117.295 | 6.938 |
| Q83 | 176.1 | 57.92 | 28.01 | 8.173 | 118.9 | 119.131 | 8.183 |

|      |       |       |       |       |       |         |       |
|------|-------|-------|-------|-------|-------|---------|-------|
| N84  | 174.7 | 54.60 | 37.17 | 8.958 | 117.4 | 117.481 | 8.966 |
| T85  | 174.6 | 65.37 | 68.58 | 7.945 | 117.7 | 117.610 | 7.955 |
| Q86  | 176.1 | 57.45 | 30.98 | 8.609 | 125.5 | 125.472 | 8.624 |
| G87  | 168.5 | 44.57 | -     | 7.749 | 105.0 | 104.856 | 7.716 |
| L88  | 174.6 | 52.81 | 46.41 | 9.164 | 126.2 | 126.146 | 9.149 |
| I89  | 174.1 | 59.82 | -     | 9.233 | 123.5 | 123.474 | 9.225 |
| F90  | 174.5 | 55.83 | 42.38 | 9.034 | 128.9 | 128.906 | 9.051 |
| V91  | 173.8 | 61.62 | 32.39 | 8.445 | 128.5 | 128.434 | 8.398 |
| V92  | 174.0 | 59.40 | 35.53 | 8.863 | 124.1 | 123.981 | 8.825 |
| D93  | 180.0 | 53.30 | 40.69 | 9.190 | 124.7 | 124.615 | 9.164 |
| S94  | 172.9 | 61.15 | 63.10 | 8.405 | 124.1 | 124.033 | 8.394 |
| N95  | 174.1 | 53.05 | 41.86 | 8.971 | 117.7 | 117.752 | 9.003 |
| D96  | 176.8 | 51.43 | 38.75 | 6.986 | 119.9 | 119.787 | 6.975 |
| R97  | 178.8 | 59.23 | 29.64 | 7.944 | 124.1 | 124.241 | 7.956 |
| E98  | 178.5 | 58.74 | 29.32 | 8.532 | 118.1 | 118.368 | 8.505 |
| R99  | 177.0 | 56.27 | 30.74 | 7.182 | 113.6 | 113.482 | 7.221 |
| V100 | 176.0 | 65.72 | 31.06 | 7.113 | 122.1 | 122.088 | 7.098 |
| N101 | 177.1 | 56.34 | 37.49 | 8.403 | 119.4 | 119.486 | 8.386 |
| E102 | 178.4 | 59.11 | 28.88 | 7.539 | 123.7 | 123.725 | 7.560 |
| A103 | 178.4 | 55.87 | 17.45 | 8.017 | 121.9 | 121.847 | 8.035 |
| R104 | 177.5 | 60.38 | 29.53 | 8.181 | 117.3 | 117.240 | 8.167 |
| E105 | 180.1 | 59.79 | 29.18 | 8.188 | 118.1 | 118.031 | 8.184 |
| E106 | 179.9 | 58.08 | 28.75 | 8.130 | 117.2 | 117.073 | 8.132 |
| L107 | 178.1 | 58.41 | 40.54 | 8.398 | 121.8 | 121.833 | 8.404 |
| M108 | 179.8 | 57.05 | 30.54 | 8.655 | 115.0 | 114.945 | 8.614 |
| R109 | 179.7 | 59.57 | 30.12 | 7.851 | 119.4 | 119.425 | 7.842 |
| M110 | 177.3 | 59.19 | 32.80 | 7.615 | 118.9 | 118.932 | 7.644 |
| L111 | 177.1 | 55.76 | 39.59 | 7.843 | 114.6 | 114.608 | 7.845 |
| A112 | 178.4 | 52.18 | 18.75 | 7.049 | 120.4 | 120.377 | 7.039 |
| E113 | 178.7 | 56.36 | 28.00 | 7.391 | 118.4 | 118.415 | 7.387 |
| D114 | 179.1 | 57.95 | 40.75 | 9.253 | 128.9 | 128.922 | 9.194 |
| E115 | 177.2 | 58.85 | 30.46 | 9.326 | 117.0 | 117.166 | 9.354 |
| L116 | 178.2 | 53.02 | 41.85 | 7.196 | 114.3 | 114.284 | 7.191 |
| R117 | 176.0 | 60.19 | 29.96 | 7.492 | 123.1 | 123.079 | 7.483 |
| D118 | 176.3 | 54.17 | 41.59 | 8.505 | 114.9 | 114.913 | 8.476 |
| A119 | 178.4 | 52.81 | 17.88 | 7.239 | 122.6 | 122.577 | 7.226 |
| V120 | 173.6 | 61.63 | 32.07 | 7.415 | 119.3 | 119.332 | 7.373 |
| L121 | 172.0 | 54.02 | 45.88 | 8.514 | 125.3 | 125.308 | 8.515 |
| L122 | 173.9 | 52.24 | 45.25 | 9.212 | 129.4 | 129.431 | 9.213 |
| V123 | 175.9 | 57.92 | 41.16 | 9.031 | 126.2 | 126.149 | 9.031 |
| F124 | 174.7 | 52.28 | 39.36 | 8.645 | 125.5 | 125.517 | 8.639 |
| A125 | 174.9 | 49.91 | 17.05 | 8.615 | 128.8 | 128.798 | 8.614 |
| N126 | -     | 52.86 | 41.71 | 8.784 | 122.1 | 122.087 | 8.785 |
| K127 | 176.3 | 57.02 | 28.77 | 7.537 | 116.0 | 116.000 | 7.545 |
| Q128 | 174.8 | 56.95 | 28.75 | 7.981 | 112.7 | 112.696 | 7.980 |
| D129 | 176.7 | 54.34 | 40.44 | 9.669 | 113.5 | 113.419 | 9.674 |
| L130 | -     | 54.83 | 40.53 | 7.260 | 122.5 | 122.125 | 7.265 |
| P131 | 177.5 | 64.58 | 31.73 | -     | -     | -       | -     |
| N132 | 175.3 | 52.32 | 38.41 | 8.487 | 115.3 | 115.318 | 8.526 |
| A133 | 178.6 | 53.25 | 18.14 | 7.296 | 121.8 | 121.750 | 7.301 |
| M134 | 175.1 | 56.32 | 35.42 | 8.196 | 123.0 | 122.967 | 8.208 |

|      |       |       |       |       |       |         |       |
|------|-------|-------|-------|-------|-------|---------|-------|
| N135 | 175.4 | 51.36 | 38.69 | 8.717 | 118.6 | 118.659 | 8.719 |
| A136 | 177.5 | 55.71 | 17.89 | 8.870 | 119.3 | 119.334 | 8.841 |
| A137 | 180.2 | 55.74 | 17.51 | 8.403 | 124.1 | 123.902 | 8.398 |
| E138 | 179.3 | 59.21 | 29.36 | 8.323 | 121.5 | 121.474 | 8.332 |
| I139 | 177.0 | 64.11 | 35.93 | 8.284 | 119.2 | 119.183 | 8.283 |
| T140 | 176.3 | 67.91 | -     | 8.191 | 117.4 | 117.362 | 8.203 |
| D141 | 179.1 | 57.48 | 41.38 | 7.353 | 120.5 | 120.491 | 7.351 |
| K142 | 178.8 | 58.69 | 32.87 | 8.468 | 118.8 | 118.782 | 8.467 |
| L143 | 175.5 | 55.05 | 41.80 | 8.366 | 115.4 | 115.393 | 8.374 |
| G144 | 177.3 | 46.30 | -     | 7.314 | 103.9 | 103.908 | 7.321 |
| L145 | 177.3 | 56.86 | 37.66 | 7.166 | 116.3 | 116.202 | 7.170 |
| H146 | 176.9 | 58.71 | 29.76 | 7.976 | 112.2 | 112.174 | 7.946 |
| S147 | 174.7 | 59.18 | 63.85 | 7.554 | 113.5 | 113.411 | 7.552 |
| L148 | 177.4 | 54.74 | 41.21 | 7.267 | 122.7 | 122.803 | 7.271 |
| R149 | 176.0 | 58.67 | 28.54 | 8.335 | 123.0 | 123.034 | 8.339 |
| H150 | 174.1 | 56.25 | 28.45 | 8.536 | 119.0 | 118.994 | 8.536 |
| R151 | 174.1 | 53.35 | 31.98 | 7.737 | 118.6 | 118.653 | 7.730 |
| N152 | 173.7 | 52.93 | 38.08 | 9.229 | 127.0 | 127.000 | 9.206 |
| W153 | 173.7 | 55.17 | 34.59 | 7.983 | 122.1 | 121.936 | 7.993 |
| Y154 | 172.6 | 56.87 | 39.97 | 8.108 | 121.7 | 121.770 | 8.102 |
| I155 | 170.3 | 57.50 | 41.36 | 6.983 | 123.2 | 123.197 | 6.996 |
| Q156 | 174.9 | 52.29 | 32.00 | 8.708 | 126.0 | 126.096 | 8.735 |
| A157 | 177.8 | 52.20 | 18.60 | 9.010 | 132.9 | 133.034 | 9.001 |
| T158 | 173.7 | 60.56 | 72.77 | 8.714 | 116.3 | 116.313 | 8.708 |
| C159 | 174.5 | 58.12 | 28.73 | 8.212 | 120.8 | 120.730 | 8.224 |
| A160 | 176.8 | 55.62 | 20.82 | 9.171 | 132.4 | 132.373 | 9.177 |
| T161 | 176.4 | 63.36 | 66.79 | 6.981 | 101.1 | 101.184 | 6.986 |
| S162 | 176.2 | 58.15 | 64.50 | 7.571 | 115.7 | 115.704 | 7.577 |
| G163 | 173.5 | 45.05 | -     | 8.131 | 112.3 | 112.334 | 8.118 |
| D164 | 176.7 | 56.22 | 40.98 | 7.820 | 124.1 | 124.062 | 7.823 |
| G165 | 174.5 | 47.02 | -     | 8.520 | 113.3 | 113.332 | 8.492 |
| L166 | 179.2 | 57.84 | 41.24 | 7.079 | 117.4 | 117.393 | 7.066 |
| Y167 | 177.8 | 61.77 | 35.79 | 8.466 | 116.7 | 116.698 | 8.458 |
| E168 | 181.1 | 61.10 | 27.76 | 9.346 | 122.6 | 122.716 | 9.337 |
| G169 | 176.9 | 47.57 | -     | 8.035 | 106.7 | 106.786 | 8.049 |
| L170 | -     | 55.72 | 39.44 | 7.942 | 122.0 | 121.934 | 7.942 |
| D171 | 178.5 | 58.04 | 40.92 | 7.948 | 122.0 | 122.007 | 7.956 |
| W172 | 178.9 | 62.87 | 27.59 | 7.379 | 120.5 | 120.413 | 7.387 |
| L173 | 178.5 | 58.17 | 42.63 | 8.232 | 119.4 | 119.383 | 8.243 |
| S174 | 175.7 | 61.91 | 62.90 | 8.827 | 113.0 | 113.040 | 8.835 |
| N175 | 177.3 | 55.76 | 38.08 | 7.555 | 118.9 | 118.947 | 7.565 |
| Q176 | 178.0 | 56.26 | 27.85 | 7.525 | 116.4 | 116.210 | 7.528 |
| L177 | 177.6 | 55.54 | 41.58 | 7.493 | 116.9 | 116.840 | 7.500 |
| R178 | -     | 57.45 | 29.98 | 7.565 | 118.6 | 118.532 | 7.563 |
| N179 | 174.9 | 53.40 | 38.64 | 7.997 | 117.6 | 117.689 | 7.978 |
| Q180 | 174.9 | 55.83 | 29.21 | 7.909 | 120.6 | 120.499 | 7.898 |
| K181 | -     | 57.65 | 33.20 | 7.889 | 127.7 | 127.682 | 7.888 |

**Table S3.** Results of the fits of the  $^{15}\text{N}$  CPMG relaxation dispersion curves of  $\Delta 17\text{Arf1-GDP}$  at two magnetic fields (700MHz and 950MHz) at 298K to a global two state fast exchange. The optimized value of the global  $\tau_{\text{ex}}$  was found equal to  $0.65 \pm 0.05$  ms. Since the exchange regime is fast, it is not possible to extract both population and chemical shift differences. The fitted parameter is then  $p_{\text{B}}(1-p_{\text{B}})(\Delta\delta)^2$  for each residue. The values of  $\Delta\delta$  given in the table correspond to the minimal differences of chemical shifts between the two states in exchange, i.e. with  $p_{\text{B}}=0.5$ .

| #res | $\Delta\delta(\text{ppm})$ | $R_{2\_1}(\text{s}^{-1})$ <sup>(a)</sup> | $R_{\text{ex\_}1}(\text{s}^{-1})$ | $R_{2\_2}(\text{s}^{-1})$ | $R_{\text{ex\_}2}(\text{s}^{-1})$ | $R_{\text{ex\_}1}/R_{\text{ex\_}2}$ |
|------|----------------------------|------------------------------------------|-----------------------------------|---------------------------|-----------------------------------|-------------------------------------|
| 21   | 0.505 (0.269)              | 30.75 (1.81) <sup>(b)</sup>              | 14.73 (4.06)                      | 17.79 (1.22)              | 8.00 (2.20)                       | 1,84                                |
| 22   | 0.349 (0.194)              | 26.71 (1.10)                             | 7.01 (2.10)                       | 20.12 (0.70)              | 3.81 (1.14)                       | 1,84                                |
| 26   | 0.419 (0.171)              | 22.44 (0.74)                             | 10.13 (1.54)                      | 17.41 (0.55)              | 5.50 (0.84)                       | 1,84                                |
| 37   | 0.501 (0.232)              | 29.34 (1.49)                             | 14.49 (2.99)                      | 18.88 (0.85)              | 7.87 (1.62)                       | 1,84                                |
| 41   | 0.347 (0.140)              | 20.32 (0.46)                             | 6.97 (1.03)                       | 8.74 (1.23)               | 3.79 (0.56)                       | 1,84                                |
| 54   | 0.523 (0.224)              | 26.20 (1.45)                             | 15.80 (2.69)                      | 17.21 (0.74)              | 8.58 (1.46)                       | 1,84                                |
| 58   | 0.429 (0.162)              | 24.50 (0.70)                             | 10.65 (1.30)                      | 16.41 (0.39)              | 5.78 (0.71)                       | 1,84                                |
| 59   | 0.408 (0.160)              | 23.19 (0.67)                             | 9.61 (1.36)                       | 17.70 (0.43)              | 5.22 (0.74)                       | 1,84                                |
| 61   | 0.379 (0.165)              | 22.24 (0.73)                             | 8.31 (1.47)                       | 16.18 (0.54)              | 4.51 (0.80)                       | 1,84                                |
| 63   | 0.681 (0.248)              | 26.33 (1.28)                             | 26.81 (3.08)                      | 20.74 (0.90)              | 14.56 (1.67)                      | 1,84                                |
| 64   | 0.317 (0.150)              | 26.01 (0.67)                             | 5.79 (1.22)                       | 13.57 (0.39)              | 3.15 (0.66)                       | 1,84                                |
| 70   | 0.509 (0.154)              | 17.28 (0.49)                             | 14.95 (0.90)                      | 14.20 (0.32)              | 8.12 (0.49)                       | 1,84                                |
| 71   | 0.222 (0.112)              | 14.37 (0.33)                             | 2.85 (0.69)                       | 11.80 (0.28)              | 1.55 (0.38)                       | 1,84                                |
| 81   | 0.226 (0.145)              | 30.49 (1.02)                             | 2.95 (1.21)                       | 6.00 (0.34)               | 1.58 (0.68)                       | 1,87                                |
| 86   | 0.215 (0.156)              | 18.28 (0.83)                             | 2.66 (1.38)                       | 15.22 (0.56)              | 1.32 (0.85)                       | 2,02                                |
| 88   | 0.628 (0.216)              | 28.52 (0.96)                             | 22.80 (2.27)                      | 21.58 (0.72)              | 12.38 (1.23)                      | 1,84                                |
| 102  | 0.231 (0.104)              | 18.79 (0.29)                             | 3.07 (0.57)                       | 15.46 (0.26)              | 1.67 (0.31)                       | 1,84                                |
| 109  | 0.245 (0.122)              | 21.89 (0.43)                             | 3.47 (0.83)                       | 14.25 (0.31)              | 1.88 (0.45)                       | 1,85                                |
| 120  | 0.350 (0.131)              | 22.10 (0.41)                             | 7.09 (0.85)                       | 17.14 (0.39)              | 3.85 (0.46)                       | 1,84                                |
| 121  | 0.295 (0.135)              | 20.83 (0.48)                             | 5.03 (1.00)                       | 16.38 (0.52)              | 2.73 (0.54)                       | 1,84                                |
| 124  | 0.228 (0.140)              | 20.73 (0.57)                             | 3.00 (1.14)                       | 16.09 (0.44)              | 1.62 (0.63)                       | 1,85                                |
| 127  | 0.245 (0.140)              | 20.50 (0.54)                             | 3.47 (1.10)                       | 15.85 (0.48)              | 1.88 (0.60)                       | 1,85                                |
| 156  | 0.208 (0.124)              | 20.07 (0.43)                             | 2.49 (0.87)                       | 17.56 (0.40)              | 1.34 (0.48)                       | 1,86                                |
| 159  | 0.286 (0.117)              | 20.52 (0.38)                             | 4.71 (0.71)                       | 17.55 (0.25)              | 2.56 (0.39)                       | 1,84                                |
| 161  | 0.284 (0.125)              | 18.23 (0.43)                             | 4.66 (0.84)                       | 16.54 (0.33)              | 2.53 (0.46)                       | 1,84                                |
| 167  | 0.266 (0.168)              | 22.36 (0.85)                             | 4.08 (1.61)                       | 18.04 (0.64)              | 2.17 (0.93)                       | 1,88                                |
| 168  | 0.398 (0.143)              | 20.49 (0.50)                             | 9.14 (0.99)                       | 19.95 (0.44)              | 4.96 (0.54)                       | 1,84                                |
| 171  | 0.277 (0.145)              | 23.70 (0.62)                             | 4.42 (1.18)                       | 18.45 (0.44)              | 2.40 (0.65)                       | 1,84                                |
| 172  | 0.340 (0.146)              | 21.48 (0.52)                             | 6.68 (1.10)                       | 18.17 (0.43)              | 3.63 (0.60)                       | 1,84                                |
| 175  | 0.270 (0.106)              | 22.98 (0.29)                             | 4.21 (0.57)                       | 16.60 (0.21)              | 2.29 (0.31)                       | 1,84                                |
| 176  | 0.287 (0.118)              | 21.20 (0.36)                             | 4.76 (0.74)                       | 16.22 (0.30)              | 2.58 (0.40)                       | 1,84                                |
| 179  | 0.174 (0.117)              | 10.63 (0.43)                             | 1.75 (0.78)                       | 9.30 (0.30)               | 0.92 (0.45)                       | 1,90                                |

<sup>(a)</sup>  $R_2$  and exchange contribution  $R_{\text{ex}}$  underscored 1 and 2 correspond to those at 950MHz and 700MHz, respectively. <sup>(b)</sup> Uncertainties (in brackets) are the standart deviations obtained from 1000 Monte Carlo simulations.



**Table S4:**  $^1\text{H}/^2\text{H}$  exchange rates of amide protons for  $\Delta 17\text{Arf1-GDP}$  and  $\text{Arf1-GDP}$ . Data are shown only for assigned residues with no overlapping. “<min” means that the amide proton has disappeared in the first ( $^1\text{H}, ^{15}\text{N}$ ) HSQC.

| Arf1-GDP |        |        | $\Delta 17\text{Arf1-GDP}$ |        |        |
|----------|--------|--------|----------------------------|--------|--------|
| Residue  | T (h)  | dT (h) | Residue                    | T (h)  | dT (h) |
| 6        | <min   |        |                            |        |        |
| 7        | <min   |        |                            |        |        |
| 9        | <min   |        |                            |        |        |
| 10       | <min   |        |                            |        |        |
| 12-13    | <min   |        |                            |        |        |
| 17-19    | <min   |        | 19                         | <min   |        |
| 20       | >120   |        | 20                         |        |        |
| 21       | >120   |        | 21                         | >120   |        |
| 22       | >120   |        | 22                         | >120   |        |
| 24       | <min   |        | 24                         | 3.885  | 1.013  |
| 25       | 3.255  | 0.537  | 25                         | 6.876  | 0.652  |
| 26       | <min   |        | 26                         | <min   |        |
| 27       | 4.819  | 3.526  | 27                         | 3.299  | 0.613  |
| 29       | >120   |        | 29                         | 25.504 | 2.012  |
| 30       | <min   |        | 30                         | <min   |        |
| 31       | >120   |        | 31                         | 27.908 | 4.089  |
| 32       | >120   |        | 32                         |        |        |
| 33       | >120   |        | 33                         |        |        |
| 34       | >120   |        | 34                         | >120   |        |
| 35       | >120   |        | 35                         | >120   |        |
| 36       | 7.568  | 0.677  | 36                         | <min   |        |
| 37       | 0.65   | 0.166  | 37                         | 3.515  | 0.308  |
| 38-54    | <min   |        | 38-42,44-52, 54            | <min   | <min   |
| 55       | 0.514  | 0.284  | 55-72                      | <min   |        |
| 56       | 1.479  | 0.342  |                            |        |        |
| 57       | <min   |        |                            |        |        |
| 58       | 21.212 | 3.848  |                            |        |        |
| 59-60    | <min   |        |                            |        |        |
| 61       | 2.134  | 0.201  |                            |        |        |
| 62       | 14.91  | 1.452  |                            |        |        |
| 63       | 18.292 | 1.956  |                            |        |        |
| 65       | >120   |        |                            |        |        |
| 67       | 0.331  | 0.251  |                            |        |        |
| 68       | 1.946  | 0.425  |                            |        |        |
| 69-71    | <min   |        |                            |        |        |
| 77-79    | <min   |        | 77-79                      | <min   |        |
| 81-86    | <min   |        | 81-86                      | <min   |        |
| 87       | 0.63   | 0.291  | 87                         | 0.587  | 0.524  |
| 88-92    | >120   |        | 88-92                      | >120   |        |
| 93       | 3.602  | 0.611  | 93                         | 4.793  | 0.331  |
| 94       | >120   |        | 94                         |        |        |
| 95       | >120   |        | 95                         | >120   |        |

|              |        |       |         |        |       |
|--------------|--------|-------|---------|--------|-------|
| 96           | 1.663  | 0.401 | 96      | 4.502  | 0.324 |
| 97-98        | <min   |       | 97-102  | <min   |       |
| 99           | >120   |       |         |        |       |
| 100,102      | <min   |       | 103     | 46.595 | 3.259 |
| 104          | 14.209 | 1.401 | 104     | 39.286 | 2.338 |
| 105          | 2.476  | 0.266 | 105     | 6.943  | 0.374 |
| 106          |        |       | 106     | >120   |       |
| 107          | >120   |       | 107-108 | >120   |       |
| 108          |        |       |         |        |       |
| 109          | 1.165  | 0.155 | 109     | 3.811  | 0.22  |
| 110          |        |       | 110     | >120   |       |
| 111          | >120   |       | 111     | >120   |       |
| 112-113, 115 | <min   |       | 112     | 0.656  | 0.836 |
|              |        |       | 113-115 | <min   |       |
| 116          | <min   |       | 116     | 0.899  | 0.972 |
| 118          |        |       | 118     | >120   |       |
| 119          | <min   |       |         |        |       |
| 120          | 1.422  | 0.177 | 120     | 8.049  | 0.642 |
|              |        |       | 121     | >120   |       |
| 122          | >120   |       | 122     | >120   |       |
| 123          | >120   |       | 123     | >120   |       |
| 124          | >120   |       | 124     |        |       |
| 125          | >120   |       | 125     | >120   |       |
| 126          | >120   |       | 126     | >120   |       |
| 127          | >120   |       | 127     | 26.14  | 9.409 |
| 128          | >120   |       | 128     |        |       |
| 129          | 1.939  | 0.287 | 129     | 4.957  | 0.305 |
| 132-133      | <min   |       | 132-133 | <min   |       |
| 134          | 14.062 | 1.376 | 134     |        |       |
| 135          | <min   |       | 135     | <min   |       |
| 137          | <min   |       | 137     | <min   |       |
| 138          | <min   |       | 138     | <min   |       |
| 139          | 19.489 | 1.164 | 139     | 79.012 | 7.723 |
| 140          | 0.572  | 0.294 | 140     | <min   |       |
| 141-142      | <min   |       | 141-142 | <min   |       |
| 143          | 13.168 | 0.71  | 143     | 49.772 | 2.807 |
| 144-147      | <min   |       | 144-147 | <min   |       |
| 149          | <min   |       | 149     |        |       |
| 151-153      | <min   |       | 151-153 | <min   |       |
| 154          | >120   |       | 154     | >120   |       |
| 155          | 0.568  | 0.158 | 155     | 0.843  | 0.146 |
| 156          | >120   |       | 156     | >120   |       |
| 157          | <min   |       | 157     | <min   |       |
| 158          | >120   |       | 158     | >120   |       |

|                |        |        |                |        |       |
|----------------|--------|--------|----------------|--------|-------|
| <b>159</b>     |        |        | <b>159</b>     | <min   |       |
| <b>160</b>     | 7.186  | 0.624  | <b>160</b>     | 6.363  | 0.344 |
| <b>161-165</b> | <min   |        | <b>161-168</b> | <min   |       |
| <b>166</b>     | 0.282  | 0.262  |                |        |       |
| <b>167</b>     | <min   |        |                |        |       |
| <b>169</b>     | 58.727 | 14.367 | <b>169</b>     | 5.458  | 0.353 |
| <b>170</b>     |        |        | <b>170</b>     | 12.741 | 0.605 |

|                |       |       |                |       |       |
|----------------|-------|-------|----------------|-------|-------|
| <b>171</b>     | >120  |       | <b>171</b>     | 1.841 | 0.328 |
| <b>172</b>     | 5.841 | 0.602 | <b>172</b>     | 3.713 | 0.315 |
| <b>173</b>     | >120  |       | <b>173</b>     | >120  |       |
| <b>174</b>     | >120  |       | <b>174</b>     | 1.646 | 0.129 |
| <b>176-177</b> | <min  |       | <b>175-181</b> | <min  |       |
| <b>180-181</b> | <min  |       |                |       |       |
